# Supplementary material for: Synthesis of amantadine clubbed N-aryl amino thiazoles as potent urease, α-amylase & α-glucosidase inhibitors, kinetic and molecular docking studies
Source: Royal Society of Chemistry journal article supplement (doi:10.1039/d3ra05330j), 2023-01-01
Supplement: d3ra05330j1.pdf [file d3ra05330j1.pdf]

**Synthesis of Amantadine clubbed *N*-Aryl amino thiazoles as potent Urease,  $\alpha$ -Amylase &  $\alpha$ -Glucosidase inhibitors and their kinetic and molecular docking studies.**

**Synthesis of Amantadine clubbed *N*-Aryl amino thiazoles as potent Urease,  $\alpha$ -Amylase &  $\alpha$ -Glucosidase inhibitors, kinetic and molecular docking studies.**

Fatima Tuz Zahra<sup>a</sup>, Aamer Saeed<sup>\*a</sup>, Atteeque Ahmed<sup>a</sup>, Hammad Ismail<sup>b</sup>, Muhammad Umar Ijaz<sup>c</sup>, Fernando Albericio,<sup>\*d,e</sup>

<sup>a</sup> *Department of Chemistry Quaid-i-Azam University-45320, Islamabad, Pakistan*

<sup>b</sup> *Department of Biochemistry and Biotechnology, University of Gujrat, Gujrat, 50700, Pakistan*

<sup>c</sup> *Department of Zoology, Wildlife and Fisheries, University of Agriculture, Faisalabad 38040, Pakistan*

<sup>d</sup> *Peptides Science Laboratory, School of Chemistry and Physics, University of KwaZulu-Natal, Westville, Durban 4000, South Africa.*

<sup>e</sup> *CIBER-BBN, Networking Centre on Bioengineering, Biomaterials and Nanomedicine, and Department of Organic Chemistry, University of Barcelona, 08028 Barcelona, Spain.*

Correspondence

Prof. Dr. Aamer Saeed

Email: [asaheed@qau.edu.pk](mailto:asaheed@qau.edu.pk) ; ORCID: <http://orcid.org/0000-0002-7112-9296>

Contact number: +92-51-9064-2128, Fax: +92-51-9064-2241







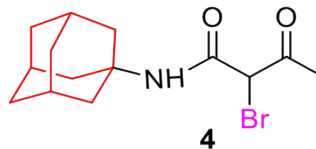

Chemical Formula:  $C_{14}H_{20}BrNO_2$

Exact Mass: 313.07

Molecular Weight: 314.22

m/z: 313.07 (100.0%), 315.07 (97.3%), 314.07 (15.1%), 316.07 (14.7%), 315.07 (1.1%), 317.07 (1.0%)

Elemental Analysis: C, 53.51; H, 6.42; Br, 25.43; N, 4.46; O, 10.18

**Fragmentation pattern:**



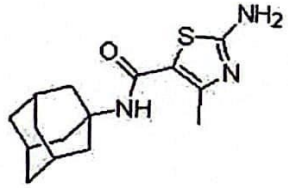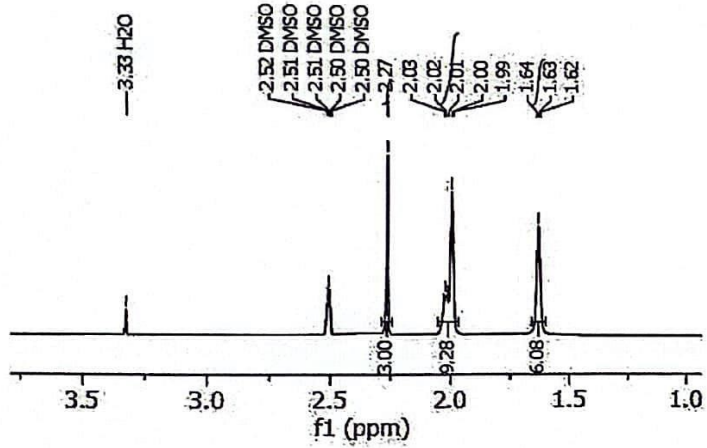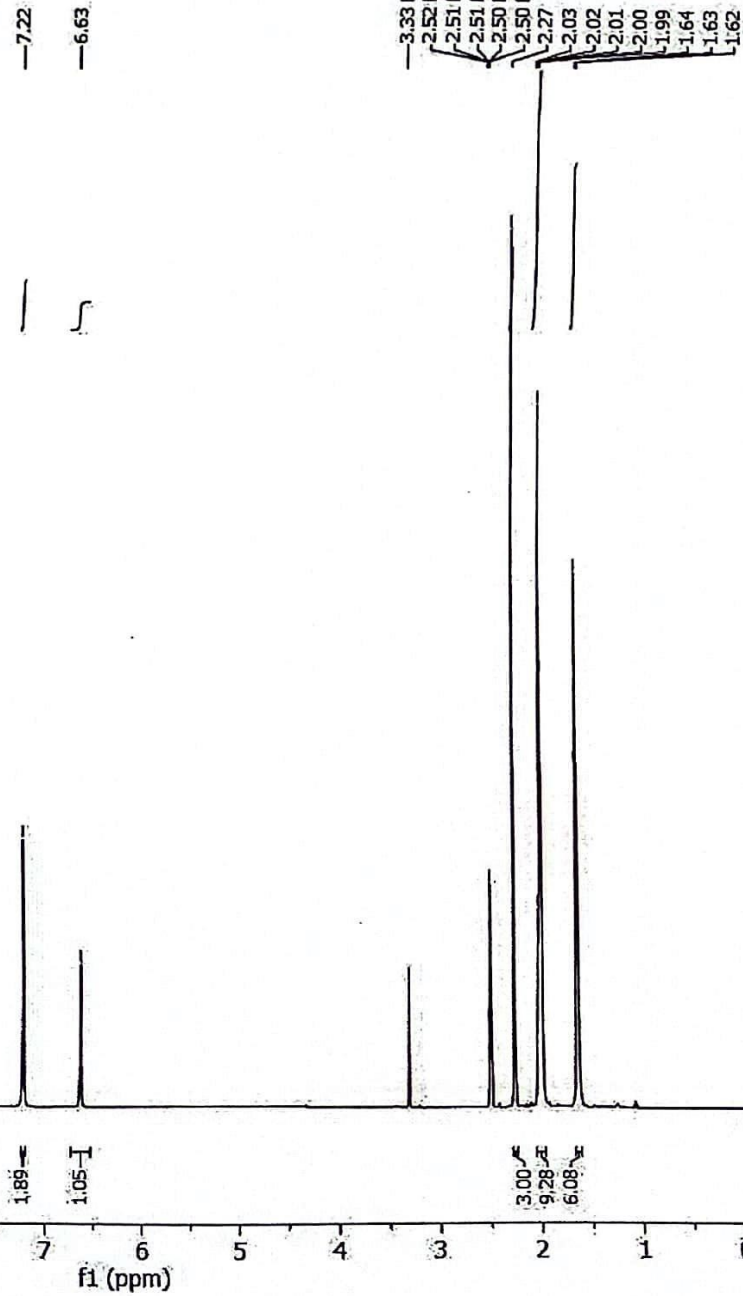



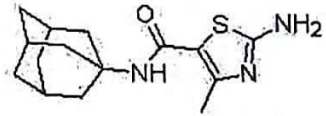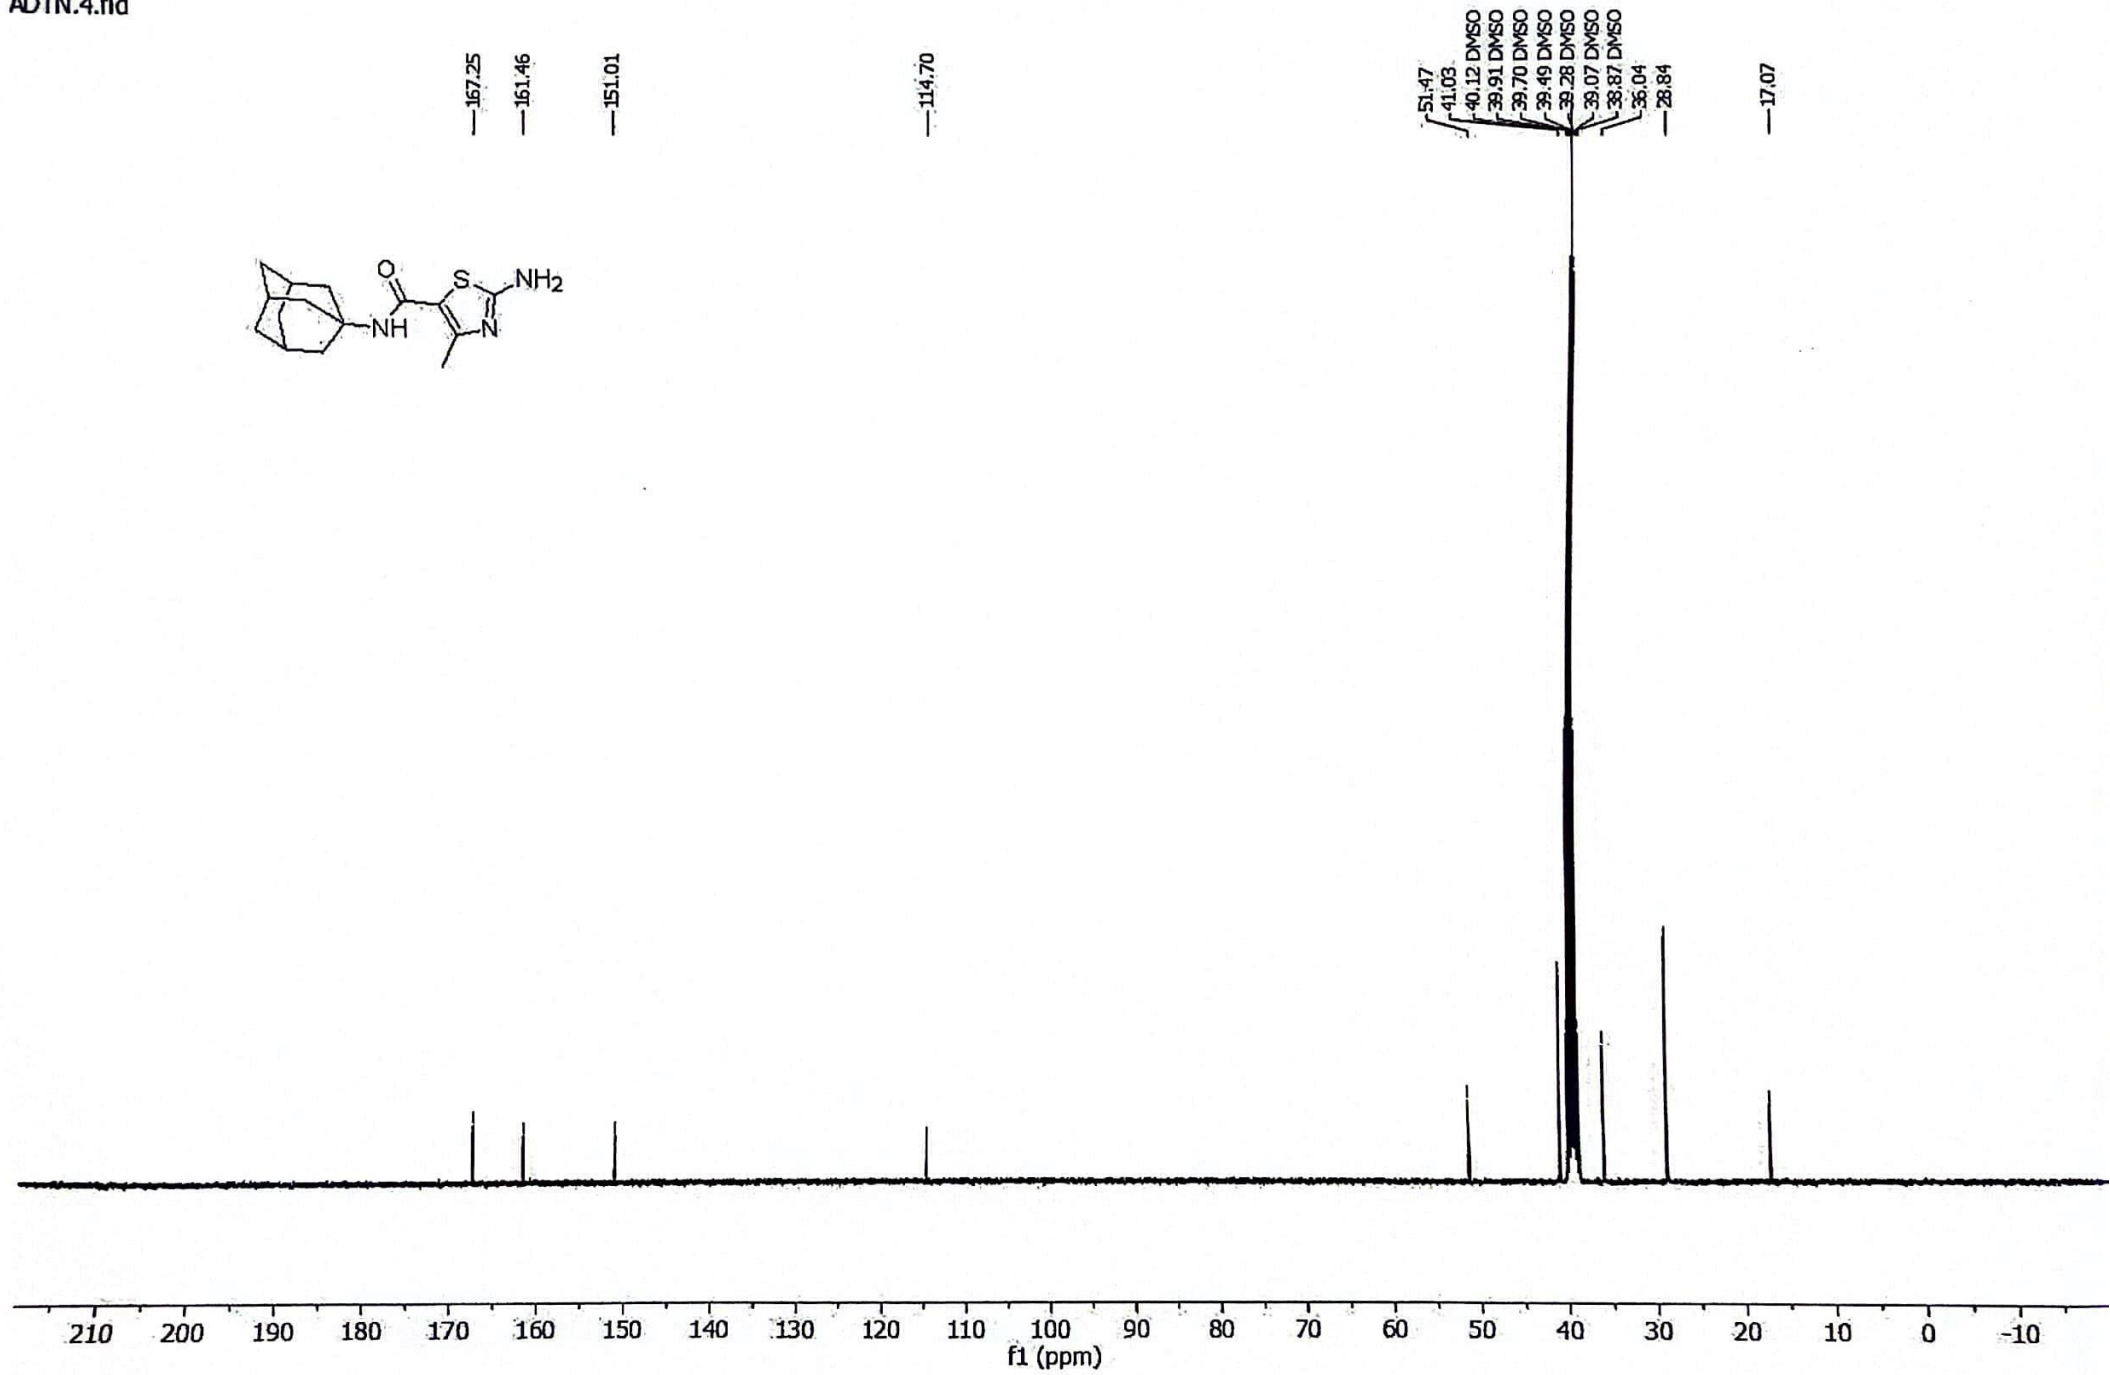



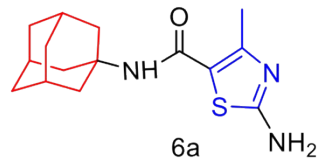

Chemical Formula: C<sub>15</sub>H<sub>21</sub>N<sub>3</sub>OS

Exact Mass: 291.14

Molecular Weight: 291.41

m/z: **291.14** (100.0%), 292.14 (16.2%), 293.14 (4.5%), 293.15 (1.2%), 292.14 (1.1%)

Elemental Analysis: C, 61.82; H, 7.26; N, 14.42; O, 5.49; S, 11.00

**Fragmentation pattern:**



































































DR.AAMER SAEED/FATIMA/TH-11\_13CNMR\_DMSO

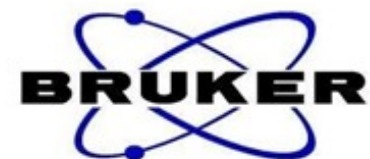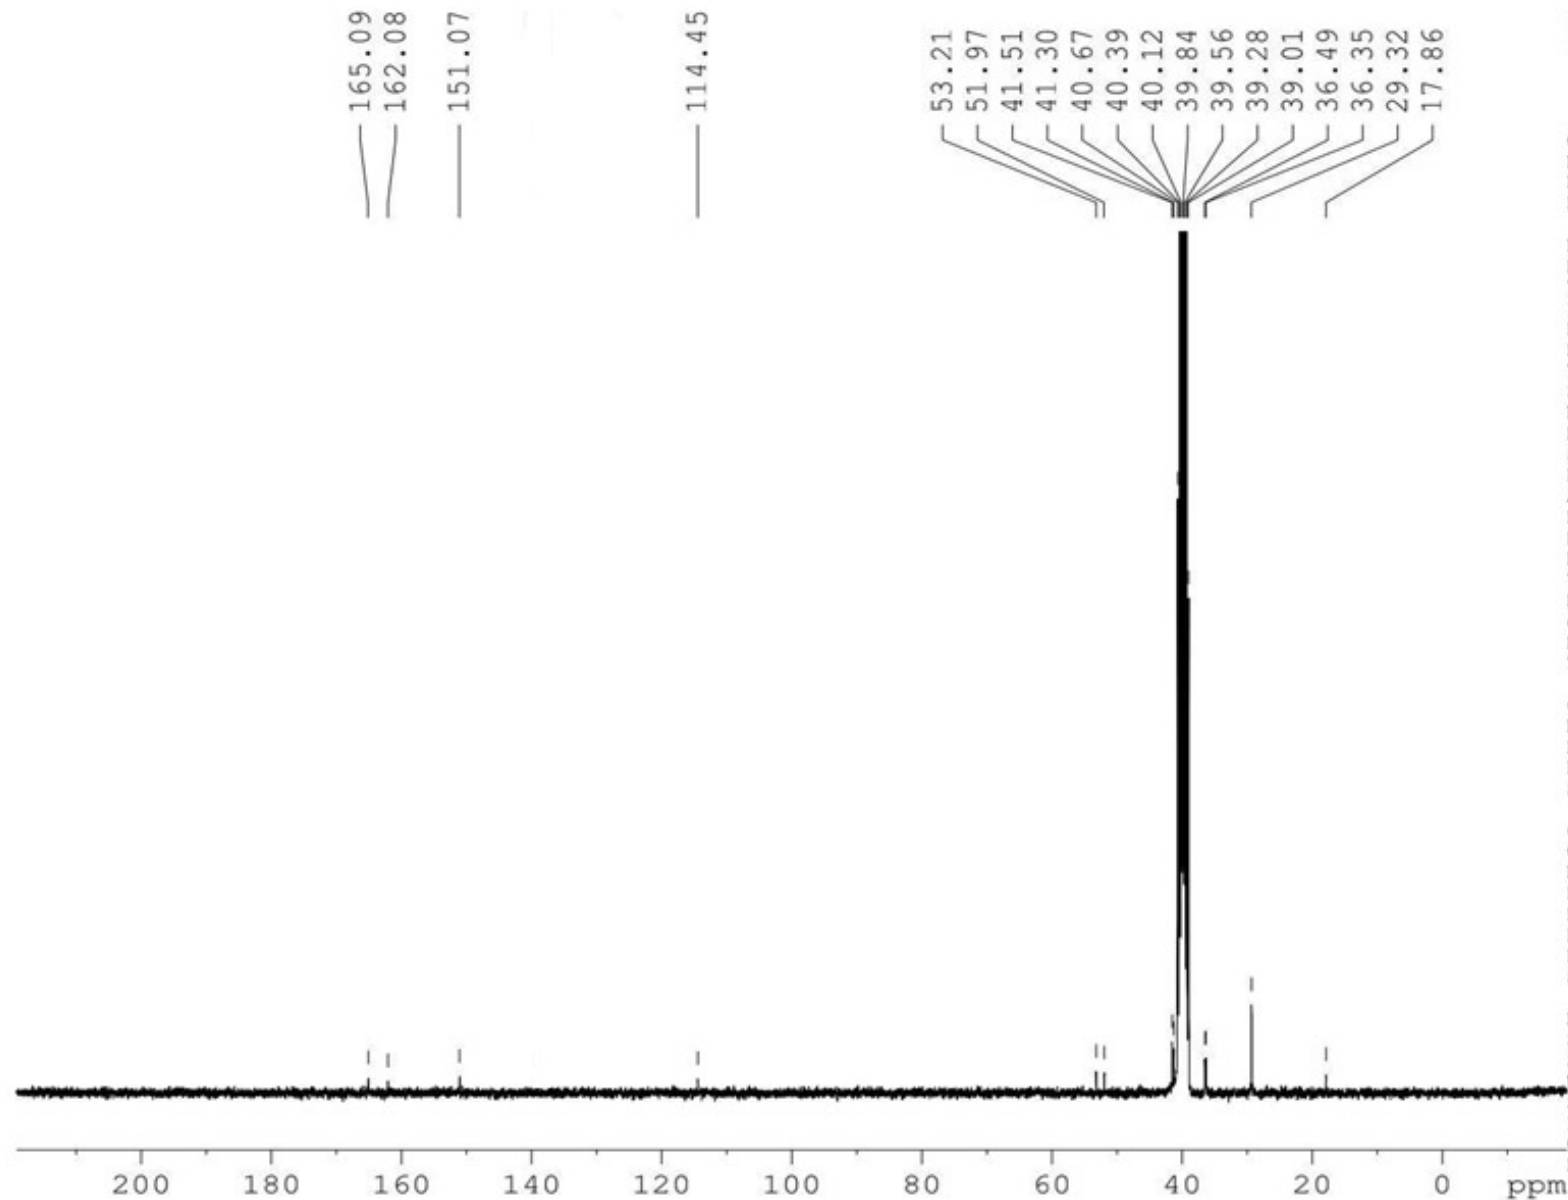

Current Data Parameters  
NAME TH-11\_13CNMR\_DMSO  
EXPNO 1  
PROCNO 1

F2 - Acquisition Parameters  
Date\_ 20230619  
Time 9.30  
INSTRUM spect  
PROBHD 5 mm BBO BB-1H  
PULPROG zgpg30  
TD 35968  
SOLVENT DMSO  
NS 18432  
DS 0  
SWH 17985.611 Hz  
FIDRES 0.500045 Hz  
AQ 0.9999604 sec  
RG 32768  
DW 27.800 usec  
DE 6.00 usec  
TE 298.2 K  
D1 2.00000000 sec  
d11 0.03000000 sec  
DELTA 1.89999998 sec  
TD0 1

----- CHANNEL f1 -----  
NUC1 13C  
P1 6.00 usec  
PL1 -5.00 dB  
SFO1 75.4752953 MHz

----- CHANNEL f2 -----  
CPDPRG2 waltz16  
NUC2 1H  
PCPD2 80.00 usec  
PL2 2.00 dB  
PL12 20.98 dB  
PL13 20.00 dB  
SFO2 300.1312005 MHz

F2 - Processing parameters  
SI 32768  
SF 75.4677490 MHz  
WDW EM  
SSB 0  
LB 1.00 Hz  
GB 0  
PC 1.40
